# Supplementary material
Source: Springer Nature journal article supplement (https://www.springermedizin.de/resource/supplementary/13019_2010_400_MOESM2_ESM.pdf/9638606)

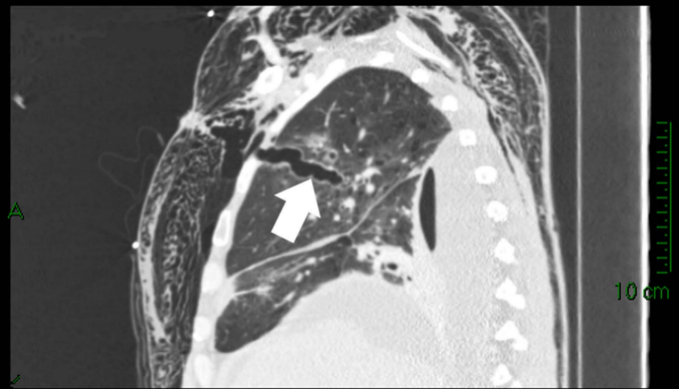

Supplement: MOESM2 [file 9638606]
